# Supplementary material for: Low-Dose Fluvoxamine Modulates Endocytic Trafficking of SARS-CoV-2 Spike Protein: A Potential Mechanism for Anti-COVID-19 Protection by Antidepressants
Source: Frontiers journal article supplement (doi:10.3389/fphar.2021.787261), 2021-12-16
Supplement: Image_1.pdf [file Image_1.pdf]

## Figure S1

**a**

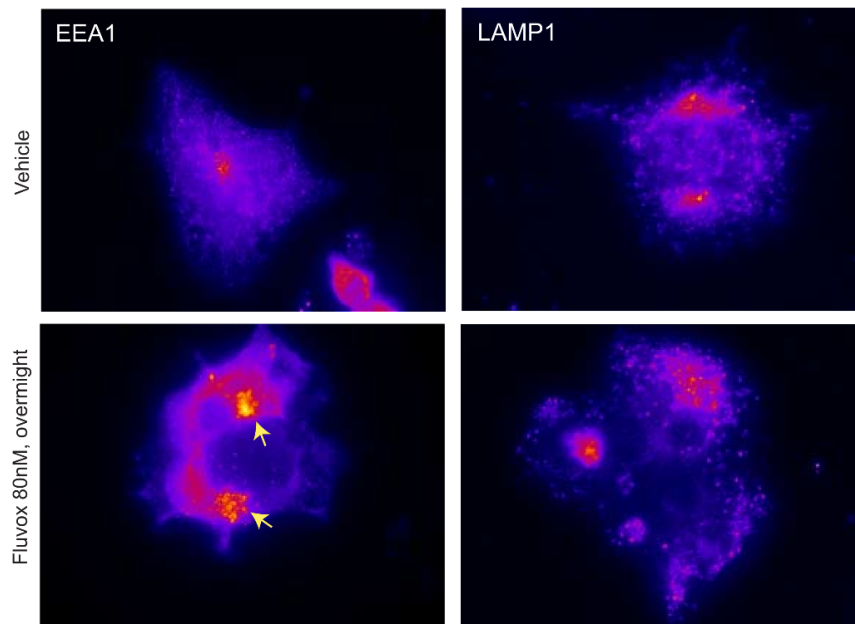

**b**

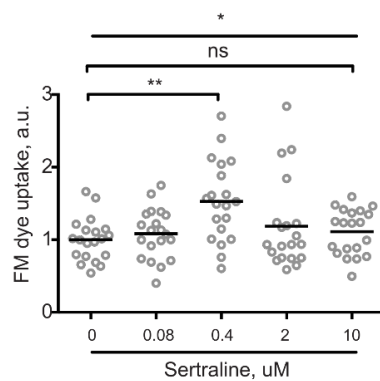

**c**

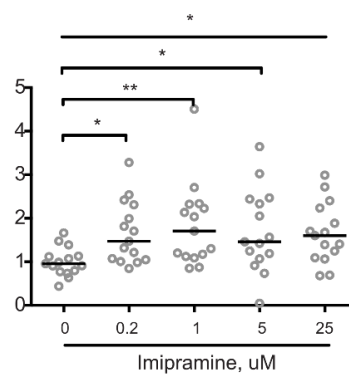

**Figure S1. Supplementary data.** **a**, HEK293T cells were treated with vehicle or 80 nM fluvoxamine overnight and immunostained for EEA1 or LAMP1. Arrows denote enlarged early endosomes following fluvoxamine treatment. **b**, Quantification of FM dye uptake experiments for various concentrations of sertraline. \* $P < 0.05$ , Kruskal-Wallis test. \*\* $P < 0.01$ , Dunn's multiple comparisons test. **c**, Quantification of FM dye uptake experiments for various concentrations of imipramine. \* $P < 0.05$ , Kruskal-Wallis test. \* $P < 0.05$ , \*\* $P < 0.01$ , Dunn's multiple comparisons test. Scale bar, 20  $\mu$ m
